# Supplementary figures and images for: Strong monsoon influence on South Asian methane emissions in 2020 revealed by a Bayesian inversion constrained by satellite observations
Source: Copernicus journal article supplement (doi:10.5194/egusphere-2025-5108), 2025-11-14

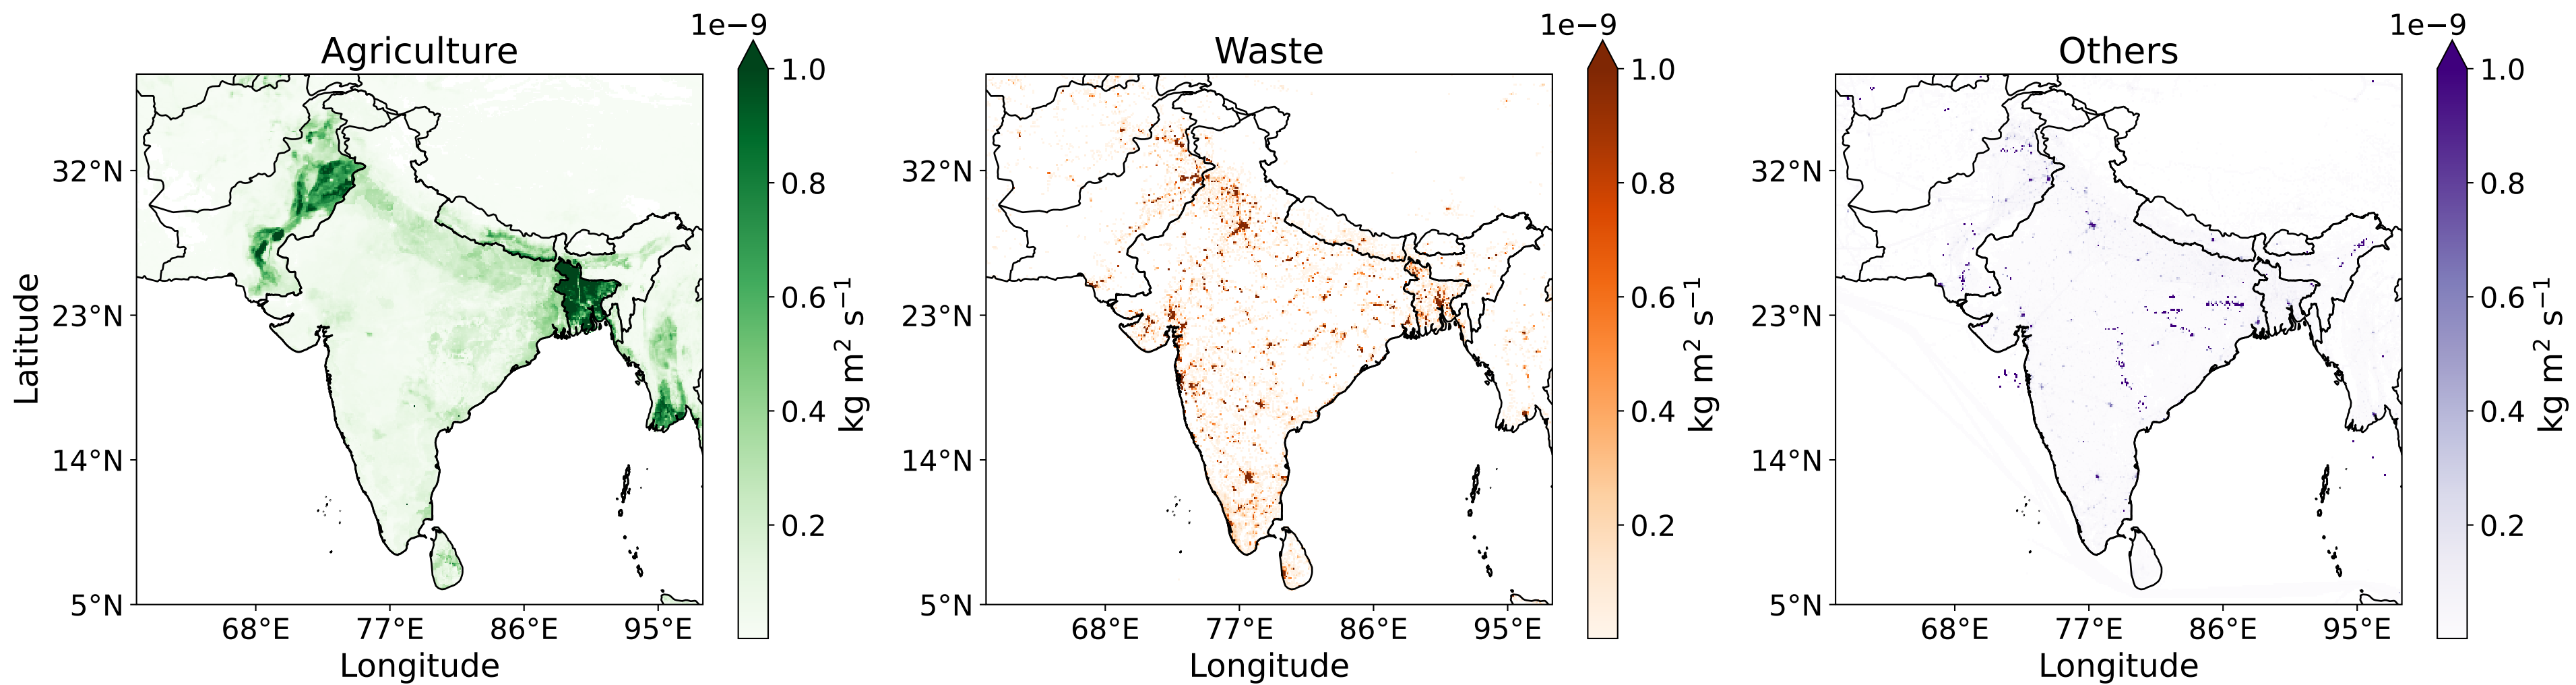

Supplement: Supplementary file 1 [file Supfig01.pdf › Supfig01.pdf]

# Seasonal Fluxes

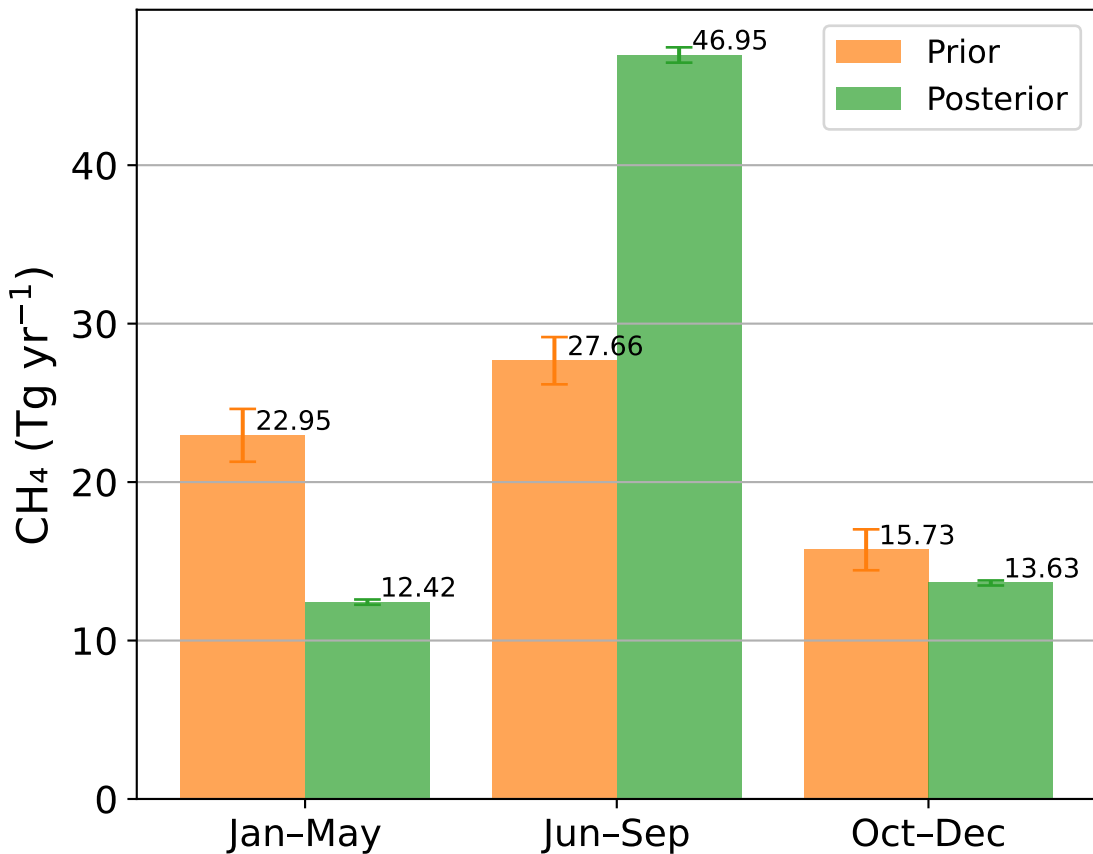

Supplement: Supplementary file 2 [file Supfig02.pdf › Supfig02.pdf]
